# Supplementary material
Source: PubMed Central journal article supplement (PMC10413434)
Supplement: ntad026_suppl_supplementary_appendices.pdf [file ntad026_suppl_supplementary_appendices.pdf]

| Supplementary Table 1. Study population genotype frequencies |    |                                      |      |                                       |      |
|--------------------------------------------------------------|----|--------------------------------------|------|---------------------------------------|------|
|                                                              |    | Nurses' Health Study<br>(N = 10,017) |      | Nurses' Health Study 2<br>(N = 2,793) |      |
| SNP                                                          |    | n                                    | %    | n                                     | %    |
| SNP rs16969968<br>G>A                                        | GG | 4,356                                | 43.5 | 1,201                                 | 43.0 |
|                                                              | AG | 4,458                                | 44.5 | 1,251                                 | 44.8 |
|                                                              | AA | 1,203                                | 12.0 | 341                                   | 12.2 |
| SNP rs588765<br>T>C                                          | TT | 2,398                                | 23.9 | 651                                   | 23.3 |
|                                                              | CT | 4,895                                | 48.9 | 1,373                                 | 49.2 |
|                                                              | CC | 2,724                                | 27.2 | 769                                   | 27.5 |
| SNP rs680244<br>T>C                                          | TT | 2,401                                | 24.0 | 651                                   | 23.3 |
|                                                              | CT | 4,907                                | 49.0 | 1,373                                 | 49.2 |
|                                                              | CC | 2,709                                | 27.0 | 769                                   | 27.5 |
| SNP rs578776<br>G>A                                          | GG | 5,214                                | 52.0 | 1,496                                 | 53.6 |
|                                                              | AG | 4,038                                | 40.3 | 1,089                                 | 39.0 |
|                                                              | AA | 765                                  | 7.6  | 208                                   | 7.4  |
| SNP rs1051730<br>G>A                                         | GG | 4,346                                | 43.4 | 1,203                                 | 43.1 |
|                                                              | AG | 4,466                                | 44.6 | 1,243                                 | 44.5 |
|                                                              | AA | 1,205                                | 12.0 | 347                                   | 12.4 |
| SNP rs12914008<br>G>A                                        | GG | 9,236                                | 92.2 | 2,553                                 | 91.4 |
|                                                              | AG | 759                                  | 7.6  | 239                                   | 8.6  |
|                                                              | AA | 22                                   | 0.2  | 1                                     | 0.0  |
| SNP rs1800497<br>G>A                                         | GG | 6,588                                | 65.8 | 1,856                                 | 66.4 |
|                                                              | AG | 3,100                                | 30.9 | 837                                   | 30.0 |
|                                                              | AA | 329                                  | 3.3  | 100                                   | 3.6  |
| SNP rs2072661<br>G>A                                         | GG | 5,588                                | 55.8 | 1,581                                 | 56.6 |
|                                                              | AG | 3,785                                | 37.8 | 1,040                                 | 37.2 |
|                                                              | AA | 644                                  | 6.4  | 172                                   | 6.2  |
| SNP rs6277<br>G>A                                            | GG | 2,500                                | 25.0 | 791                                   | 28.3 |
|                                                              | AG | 4,915                                | 49.0 | 1,355                                 | 48.5 |
|                                                              | AA | 2,602                                | 26.0 | 647                                   | 23.2 |
| SNP rs4680<br>G>A                                            | GG | 2,486                                | 24.8 | 688                                   | 24.6 |
|                                                              | AG | 5,008                                | 50.0 | 1,410                                 | 50.5 |
|                                                              | AA | 2,523                                | 25.2 | 695                                   | 24.9 |

Supplementary Table 2. Odds ratio (95% confidence interval) of smoking cessation for all genetic models tested for the 10 single nucleotide polymorphisms evaluated (<65 years of age)

| SNP        | Statistical Model | Study | Additive           | Recessive         | Dominant          | Codominant        |                    |
|------------|-------------------|-------|--------------------|-------------------|-------------------|-------------------|--------------------|
|            |                   |       | Aa vs. AA          | aa vs (Aa + AA)   | (aa + Aa) vs AA   | Aa vs AA          | aa vs. AA          |
| rs16969968 | Unadjusted        | NHS   | 0.93 (0.88, 0.98)  | 0.86 (0.78, 0.96) | 0.92 (0.86, 0.99) | 0.95 (0.88, 1.02) | 0.84 (0.75, 0.94)  |
|            |                   | NHS-2 | 0.87 (0.78, 0.96)  | 0.80 (0.64, 1.00) | 0.84 (0.73, 0.97) | 0.87 (0.75, 1.02) | 0.75 (0.59, 0.94)  |
| rs16969968 | Adjusted          | NHS   | 0.94 (0.89, 0.99)  | 0.89 (0.80, 0.99) | 0.93 (0.87, 1.01) | 0.95 (0.88, 1.03) | 0.87 (0.77, 0.98)  |
|            |                   | NHS-2 | 0.90 (0.80, 1.00)  | 0.84 (0.67, 1.05) | 0.88 (0.76, 1.02) | 0.91 (0.78, 1.06) | 0.80 (0.63, 1.01)  |
| rs578776   | Unadjusted        | NHS   | 1.10 (1.04, 1.16)  | 1.10 (0.97, 1.26) | 1.13 (1.05, 1.21) | 1.13 (1.05, 1.21) | 1.16 (1.01, 1.33)  |
|            |                   | NHS-2 | 1.26 (1.12, 1.41)  | 1.42 (1.07, 1.89) | 1.31 (1.14, 1.51) | 1.27 (1.09, 1.48) | 1.56 (1.17, 2.09)  |
| rs578776   | Adjusted          | NHS   | 1.09 (1.03, 1.16)  | 1.08 (0.95, 1.24) | 1.13 (1.05, 1.21) | 1.12 (1.04, 1.21) | 1.14 (0.99, 1.31)  |
|            |                   | NHS-2 | 1.21 (1.08, 1.37)  | 1.33 (0.99, 1.79) | 1.26 (1.08, 1.46) | 1.23 (1.05, 1.43) | 1.45 (1.07, 1.96)  |
| rs1051730  | Unadjusted        | NHS   | 0.92 (0.88, 0.97)  | 0.86 (0.78, 0.96) | 0.92 (0.86, 0.99) | 0.95 (0.88, 1.02) | 0.84 (0.75, 0.94)  |
|            |                   | NHS-2 | 0.87 (0.78, 0.97)  | 0.80 (0.64, 0.99) | 0.85 (0.74, 0.98) | 0.88 (0.76, 1.03) | 0.75 (0.59, 0.94)  |
| rs1051730  | Adjusted          | NHS   | 0.94 (0.89, 0.99)  | 0.88 (0.79, 0.99) | 0.93 (0.87, 1.00) | 0.95 (0.88, 1.03) | 0.86 (0.77, 0.97)  |
|            |                   | NHS-2 | 0.90 (0.81, 1.00)  | 0.84 (0.67, 1.04) | 0.89 (0.77, 1.03) | 0.92 (0.78, 1.07) | 0.80 (0.63, 1.01)  |
| rs1800497  | Unadjusted        | NHS   | 0.96 (0.90 - 1.02) | 1.11 (0.92, 1.35) | 0.93 (0.87, 1.00) | 0.92 (0.85, 0.99) | 1.08 (0.89, 1.32)  |
|            |                   | NHS-2 | 0.93 (0.82, 1.05)  | 1.13 (0.77, 1.67) | 0.89 (0.76, 1.03) | 0.87 (0.74, 1.01) | 1.08 (0.73, 1.60)  |
| rs1800497  | Adjusted          | NHS   | 0.96 (0.90, 1.03)  | 1.11 (0.91, 1.35) | 0.94 (0.87, 1.01) | 0.92 (0.86, 1.00) | 1.08 (0.88, 1.32)  |
|            |                   | NHS-2 | 0.94 (0.83, 1.07)  | 1.11 (0.75, 1.65) | 0.90 (0.78, 1.05) | 0.89 (0.76, 1.04) | 1.07 (0.72, 1.59)  |
| rs680244   | Unadjusted        | NHS   | 0.99 (0.94, 1.04)  | 0.99 (0.91, 1.07) | 0.98 (0.90, 1.06) | 0.98 (0.90, 1.07) | 0.97 (0.88, 1.07)  |
|            |                   | NHS-2 | 1.00 (0.91, 1.11)  | 0.97 (0.83, 1.14) | 1.04 (0.88, 1.23) | 1.06 (0.88, 1.26) | 1.01 (0.83, 1.23)  |
| rs680244   | Adjusted          | NHS   | 0.97 (0.92, 1.02)  | 0.96 (0.89, 1.05) | 0.96 (0.88, 1.05) | 0.97 (0.89, 1.06) | 0.94 (0.85, 1.05)  |
|            |                   | NHS-2 | 1.02 (0.92, 1.13)  | 0.99 (0.84, 1.16) | 1.08 (0.91, 1.28) | 1.09 (0.91, 1.31) | 1.05 (0.85, 1.28)  |
| rs588765   | Unadjusted        | NHS   | 0.99 (0.94, 1.04)  | 0.99 (0.91, 1.07) | 0.98 (0.90, 1.06) | 0.98 (0.90, 1.07) | 0.97 (0.88, 1.07)  |
|            |                   | NHS-2 | 0.99 (0.90, 1.10)  | 0.96 (0.82, 1.13) | 1.03 (0.87, 1.21) | 1.05 (0.88, 1.25) | 0.99 (0.81, 1.21)  |
| rs588765   | Adjusted          | NHS   | 0.97 (0.92, 1.02)  | 0.96 (0.89, 1.05) | 0.96 (0.88, 1.05) | 0.97 (0.89, 1.06) | 0.94 (0.85, 1.04)  |
|            |                   | NHS-2 | 1.01 (0.91, 1.12)  | 0.98 (0.83, 1.15) | 1.07 (0.90, 1.26) | 1.08 (0.90, 1.30) | 1.03 (0.84, 1.27)  |
| rs12914008 | Unadjusted        |       |                    |                   | 1.13 (0.99, 1.29) |                   |                    |
|            |                   |       |                    |                   | 1.10 (0.84, 1.43) |                   |                    |
| rs12914008 | Adjusted          |       |                    |                   | 1.14 (1.00, 1.31) |                   |                    |
|            |                   |       |                    |                   | 1.11 (0.85, 1.45) |                   |                    |
| rs2072661  | Unadjusted        | NHS   | 0.95 (0.90, 1.01)  | 0.89 (0.78, 1.03) | 0.95 (0.87, 1.02) | 0.96 (0.90, 1.04) | 0.88 (.0.76, 1.01) |
|            |                   | NHS-2 | 0.98 (0.88, 1.10)  | 1.06 (0.78, 1.43) | 0.96 (0.83, 1.11) | 0.95 (0.82, 1.10) | 1.03 (0.76, 1.40)  |
| rs2072661  | Adjusted          | NHS   | 0.96 (0.90, 1.02)  | 0.93 (0.80, 1.07) | 0.95 (0.89, 1.03) | 0.96 (0.89, 1.04) | 0.91 (0.79, 1.05)  |
|            |                   | NHS-2 | 0.99 (0.88, 1.11)  | 1.08 (0.79, 1.46) | 0.96 (0.83, 1.12) | 0.95 (0.81, 1.11) | 1.05 (0.77, 1.43)  |
| rs6277     | Unadjusted        | NHS   | 0.99 (0.94, 1.03)  | 0.98 (0.91, 1.05) | 0.98 (0.91, 1.06) | 0.99 (0.91, 1.08) | 0.97 (0.89, 1.06)  |
|            |                   | NHS-2 | 1.02 (0.92, 1.12)  | 1.05 (0.89, 1.25) | 1.00 (0.86, 1.17) | 0.98 (0.83, 1.16) | 1.04 (0.85, 1.27)  |
| rs6277     | Adjusted          | NHS   | 0.98 (0.94, 1.03)  | 0.97 (0.89, 1.04) | 0.98 (0.90, 1.06) | 0.99 (0.91, 1.08) | 0.96 (0.88, 1.05)  |
|            |                   | NHS-2 | 1.02 (0.92, 1.13)  | 1.04 (0.88, 1.24) | 1.01 (0.86, 1.19) | 1.00 (0.84, 1.18) | 1.04 (0.85, 1.27)  |
| rs4680     | Unadjusted        | NHS   | 0.97 (0.92, 1.02)  | 0.93 (0.86, 1.01) | 0.98 (0.90, 1.05) | 1.00 (0.92, 1.09) | 0.94 (0.85, 1.03)  |
|            |                   | NHS-2 | 0.99 (0.90, 1.08)  | 1.02 (0.87, 1.19) | 0.94 (0.80, 1.11) | 0.93 (0.78, 1.11) | 0.97 (0.80, 1.18)  |
| rs4680     | Adjusted          | NHS   | 0.96 (0.92, 1.01)  | 0.92 (0.85, 1.00) | 0.97 (0.89, 1.05) | 0.99 (0.91, 1.08) | 0.92 (0.84, 1.02)  |
|            |                   | NHS-2 | 0.97 (0.88, 1.07)  | 1.00 (0.85, 1.18) | 0.92 (0.78, 1.08) | 0.91 (0.76, 1.08) | 0.94 (0.77, 1.15)  |

A = Major allele, a = minor allele, AA = homozygous for major allele, aa = homozygous for minor allele, Aa = heterozygous

Supplementary Figure 1. Probability of former smoker status over time by SNP genotype

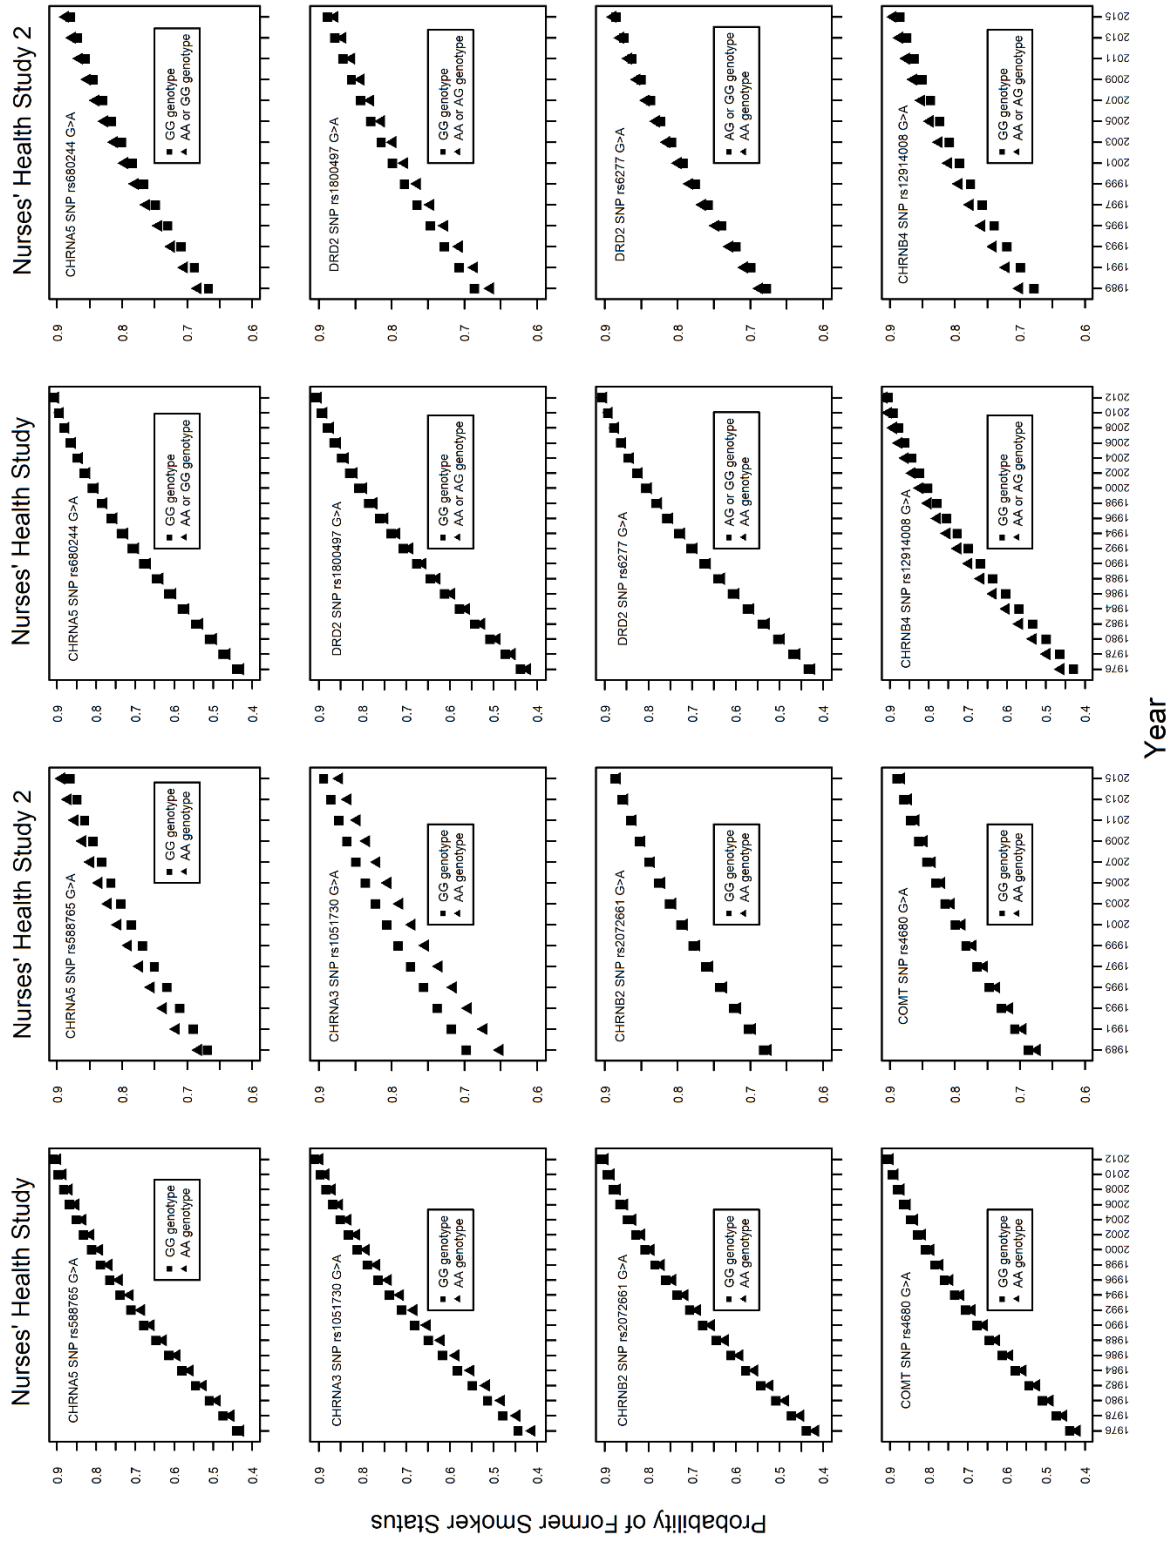

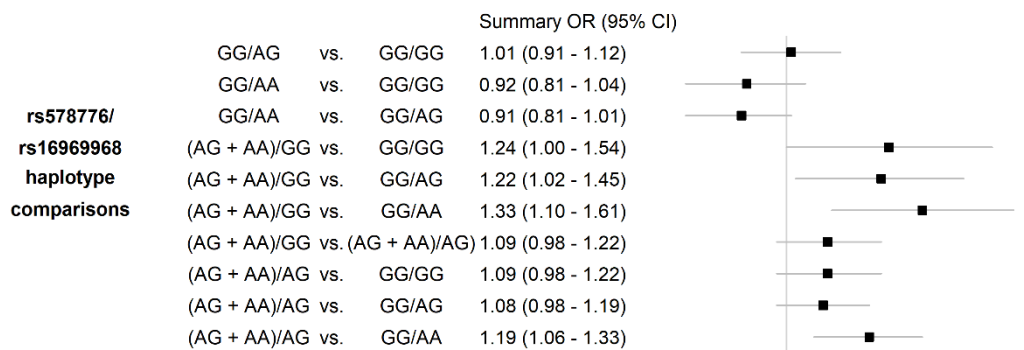

| Haplotype |            | NHS       | NHS-2     |
|-----------|------------|-----------|-----------|
| rs578776  | rs16969968 | Frequency | Frequency |
| GG        | GG         | 1435      | 408       |
| GG        | AG         | 2579      | 747       |
| GG        | AA         | 1200      | 341       |
| AG + AA   | GG         | 2921      | 793       |
| AG + AA   | AG*        | 1882      | 504       |

Supplementary Figure 2. Single nucleotide polymorphisms rs578776 and rs16969968 haplotype comparisons.

NHS = Nurses' Health Study, NHS-2 = Nurses' Health Study

\* includes n = 3 NHS participants with AA genotype for rs16969968
